# Supplementary material for: Bacterial Infection among Cancer Patients: Analysis of Isolates and Antibiotic Sensitivity Pattern
Source: Int J Microbiol. 2021 Jan 7;2021:8883700. doi: 10.1155/2021/8883700 (PMC7825358; doi:10.1155/2021/8883700)
Supplement: Supplementary Materials — The patient clinical and laboratory details are included in the database provided. [file 8883700.f1.txt]

Sl_No.	Hospital_no.	Age	Gender	Type_of_cancer	Treatment_chemotherapy	Treatment_radiotherapy	Treatment_surgery	Height	Weight	BMI	Procedure_biposy	Procedure_BMA	Procedure_ITmethotrexate	Procedure_IVcentral	Procedure_urinarycatheter	Procedure_Intubation	Precedure_tracheostomy	Procedure_ryles	Procedure_feedinggastrostomy	Procedure_bloodtransfusion	Procedure_endoscopy	Procedure_bronchoscopy	Procedure_Dlscopy	Procedure_colonoscopy	Procedure_cystoscopy	Procedure_pleuralaspiration	WBC	Hb	Platelet	Specimen_drainfliud	Specimen_bile	Specimen_bronchiallavage	Specimen_blood	Specimen_sputum	Specimen_etsuction	Specimen_pusswab	Specimen_earswab	Specimen_throatswab	Specimen_urine	Specimen_deeptissue	Isolate_Achromobacter_xylosoxidans	Isolate_Acinetobacter	Isolate_Aeromonas_hydrophila	Isolate_Bacillus	Isolate_Citrobacter	Isolate_Ecoli	Isolate_Enterobacter	Isolate_Haemophilus	Isolate_Klebsiella
1	80289582	56	1	C02.9	1	0	1	1.6	68	#NAME?	1	0	0	0	0	0	1	0	0	0	0	0	0	0	0	0	10300	11.3	147000	0	1	0	0	0	0	0	0	0	0	0	0	0	0	0	0	1	0	0	0
2	80481949	40	1	C02.9	1	0	1	1.61	51	#NAME?	0	0	0	0	0	0	0	1	0	0	0	0	0	0	0	0	3700	10.5	133000	0	0	0	1	1	0	0	0	0	0	0	0	0	0	0	0	0	0	0	0
3	80702198	53	1	C02.9	1	0	0	1.64	45	#NAME?	0	0	0	0	0	0	0	1	0	1	0	0	0	0	0	0	700	6.7	127000	0	0	0	1	1	0	0	0	0	0	0	0	0	0	0	0	0	0	0	0
4	80649852	58	1	C03	1	1	1	1.73	90	#NAME?	0	0	0	0	0	0	0	0	0	0	0	0	0	0	0	0	500	9.2	168000	0	0	0	1	0	0	0	0	0	0	0	0	1	0	0	0	0	0	0	0
5	80604258	8	1	C03.9	1	0	0		20		1	0	0	0	0	0	0	1	0	1	0	0	0	0	0	0	300	7.6	9000	0	0	0	1	0	0	0	0	0	0	0	0	0	0	0	0	1	0	0	0
6	80295667	60	2	C04	1	1	1	1.52	54	#NAME?	0	0	0	0	0	0	0	0	0	0	0	0	0	0	0	0	12100	10.9	689000	0	0	0	0	1	0	0	0	0	0	0	0	0	0	0	0	0	0	1	0
7	80493138	55	2	C06.2	1	1	1	1.59	54	#NAME?	0	0	0	0	0	1	0	1	0	0	0	0	0	0	0	0	7000	11.7	394000	0	0	0	0	1	0	0	0	0	0	0	0	0	0	0	0	0	0	0	0
8	80602510	52	1	C06.9	0	1	0	1.7	68	#NAME?	1	0	0	0	0	0	0	0	0	1	0	0	0	0	0	0	10600	10	119000	0	0	0	0	0	0	1	0	0	0	0	0	0	0	0	0	0	0	0	1
9	80466513	80	1	C10.9	0	0	0	1.61	47	#NAME?	1	0	0	1	0	0	1	1	0	0	0	0	0	0	0	0	6400	9.1	129000	0	0	0	0	0	1	0	0	0	0	0	0	0	0	0	0	0	0	0	0
10	80484500	52	1	C13	1	1	0	1.71	30	#NAME?	0	0	0	0	0	0	0	0	1	1	0	1	0	0	0	0	3500	10	180000	0	0	1	0	0	0	0	0	0	0	0	0	0	0	0	0	0	0	0	1
11	80543859	39	2	C13.0	1	1	0	1.47	23	#NAME?	0	0	0	0	0	0	1	1	0	1	0	0	0	0	0	0	8300	8.5	22000	0	0	0	1	1	0	1	0	0	0	0	0	0	0	0	0	0	0	0	3
12	80481257	55	1	C13.9	1	1	1	1.51	42	#NAME?	0	0	0	0	0	0	1	1	0	0	0	0	0	0	0	0	4200	10.9	314000	0	0	0	0	0	1	0	0	0	0	0	0	0	0	0	0	0	0	0	0
13	80502627	61	1	C13.9	0	1	0	1.47	41	#NAME?	0	0	0	0	0	0	1	0	0	0	0	0	0	0	0	0	8700	11.1	500000	0	0	0	0	0	1	0	0	0	0	0	0	0	0	0	1	0	0	0	1
14	80577624	61	1	C13.9	1	0	0	1.52	30	#NAME?	0	0	0	0	0	0	0	0	0	0	0	0	0	0	0	0	18700	12.2	225000	0	0	0	0	1	0	0	0	0	0	0	0	0	0	0	0	0	0	0	1
15	80706823	66	1	C13.9	1	1	0	1.73	47	#NAME?	1	0	0	0	0	1	0	0	0	0	1	0	0	0	0	0	2800	10.8	120000	0	0	0	1	1	0	0	0	0	0	0	0	0	0	0	0	0	0	0	2
16	80480077	65	2	C15.9	1	1	0	1.51	65	#NAME?	0	0	0	0	0	0	0	0	0	0	1	0	0	0	0	0				0	0	0	0	1	0	0	0	1	0	0	0	1	0	0	0	0	0	0	0
17	80525580	69	1	C15.9	1	1	0	1.62	36	#NAME?	1	0	0	1	1	0	0	1	0	0	0	0	0	0	0	0	12700	10.9	54000	0	0	0	1	0	0	0	0	0	0	0	0	0	0	0	0	1	0	0	0
18	80636717	47	1	C15.9	0	0	0	1.66	35	#NAME?	0	0	0	0	0	0	0	0	1	1	0	0	0	0	0	0	7200	11	358000	0	0	0	0	1	0	0	0	0	0	0	0	0	0	0	0	0	0	0	1
19	80707250	66	1	C15.9	1	1	0	1.62	46	#NAME?	1	0	0	0	0	1	0	0	0	1	1	1	0	0	0	0	10900	9.6	294000	0	0	0	0	1	0	0	0	0	0	0	0	0	0	0	0	0	0	0	0
20	80573187	61	2	C16.9	1	0	0	1.44	36	#NAME?	1	0	0	0	0	0	0	0	0	1	0	0	0	0	0	0	27800	3.2	17000	0	0	0	1	0	0	0	0	0	0	0	0	1	0	0	0	0	0	0	0
21	80495783	63	1	C18	1	0	0	1.73	60	#NAME?	0	0	0	0	0	0	0	0	0	0	0	0	0	0	0	0	8700	11.2	115000	0	0	0	0	0	0	0	0	0	1	0	0	0	0	0	0	1	0	0	0
22	80526305	62	1	C18.9	1	0	0	1.75	62	#NAME?	0	0	0	1	1	1	0	1	0	0	0	0	0	0	0	0	33000	11.8	273000	0	0	0	0	0	1	0	0	0	0	0	0	0	0	0	0	0	0	0	1
23	80528928	69	1	C18.9	1	0	1	1.64	60	#NAME?	0	0	0	0	1	1	0	0	0	1	0	0	0	1	0	0	10300	7.1	10000	0	0	0	1	0	1	0	0	0	1	0	1	2	0	0	0	2	0	0	0
24	80520712	53	1	C79.8	0	0	0				0	0	0	0	0	0	0	0	0	0	0	0	0	0	0	1	18400	13.3	372000	0	0	0	0	0	0	0	0	0	0	0	0	0	0	0	0	0	0	0	0
25	80525010	55	2	C20	0	0	0				1	0	0	0	1	0	0	1	0	1	0	0	0	0	0	0	253000	10.1	253000	0	0	0	1	0	0	0	0	0	0	0	0	0	0	0	0	1	0	0	0
26	80307687	67	1		0	0	0	1.63	50	#NAME?	0	0	0	1	0	0	0	1	1	1	1	0	0	0	0	0	4800	11.3	260000	0	0	0	0	0	0	1	0	0	1	0	0	0	0	0	0	2	0	0	0
27	80490146	56	1	C25.0	0	0	0	1.72	60	#NAME?	0	0	0	0	0	0	0	0	0	0	1	0	0	0	0	0	7900	13.2	158000	0	1	0	0	0	0	0	0	0	0	0	0	0	0	0	0	0	0	0	1
28	80472139	35	1	C25.9	0	0	1	1.74	57	#NAME?	1	0	0	1	0	0	0	0	1	1	0	0	0	0	0	0	25400	9.6	620000	0	0	0	0	0	0	1	0	0	0	0	0	0	0	0	0	0	0	0	1
29	80415630	56	1		1	1	1	1.62	45	#NAME?	0	0	0	0	0	0	1	1	0	0	0	0	0	0	0	0	20600	12.1	275000	0	0	0	0	0	1	0	0	0	0	0	0	0	0	0	0	0	0	0	1
30	80474286	63	1	C32.1	0	0	0	1.62	60	#NAME?	1	0	0	0	0	0	1	1	0	0	0	0	1	0	0	0	2000	10.2	120000	0	0	0	1	1	1	0	0	0	0	0	0	1	0	0	0	1	0	0	0
31	80585398	68	1	C32.1	1	1	0	1.74	54	#NAME?	0	0	0	0	0	0	1	1	0	0	0	0	0	0	0	0	11700	11.5	307000	0	0	0	1	1	1	0	0	0	0	0	0	0	0	0	1	0	0	1	1
32	80481584	50	2	C32.9	1	1	0	1.51	38	#NAME?	1	0	0	0	0	0	1	0	0	0	0	0	1	0	0	0	2600	8.2	150000	0	0	0	0	0	0	1	0	0	0	0	0	0	0	0	0	0	0	0	0
33	80550416	53	2	C32.9	1	1	0	1.48	25	#NAME?	0	0	0	0	0	0	1	1	0	1	0	0	1	0	0	0	5700	9.7	122000	0	0	0	0	1	0	0	0	0	0	0	0	0	0	0	0	0	0	0	1
34	80590832	56	1	C32.9	1	0	0	1.67	50	#NAME?	1	0	0	0	1	0	0	1	0	0	0	0	1	0	0	0	4000	9	121000	0	0	0	0	1	0	0	0	0	0	0	0	0	0	0	0	1	0	0	0
35	80388850	57	2	C34	0	0	0	1.49	43	#NAME?	0	0	0	0	0	0	0	0	0	1	0	0	0	0	0	0	7900	13.2	213000	0	0	0	0	1	0	0	0	0	0	0	0	0	0	0	0	0	0	0	0
36	80422520	55	1	C34	0	0	0	1.64	46	#NAME?	1	0	0	0	0	0	0	0	0	0	0	1	0	0	0	0	13900	12.7	269000	0	0	1	0	0	0	0	0	0	0	0	0	0	0	0	0	0	0	0	1
37	80428277	75	1	C34	1	0	0	1.58	54	#NAME?	0	0	0	0	0	1	0	0	0	1	0	1	0	0	0	0	15400	8.5	818000	0	0	0	0	1	0	0	0	0	1	0	0	0	0	0	0	1	0	0	0
38	80496275	57	1	C34	0	0	0	1.64	42	#NAME?	1	0	0	0	0	0	0	0	0	0	0	1	0	0	0	0	10900	12.5	376000	0	0	1	0	1	0	0	0	0	0	0	0	0	0	0	0	0	0	0	0
39	80560260	63	1	C34	1	0	0	1.86	80	#NAME?	0	0	0	0	0	0	0	0	0	0	0	1	0	0	0	0	7400	13	141000	0	0	1	0	0	0	0	0	0	0	0	0	0	0	0	0	0	0	0	0
40	80707005	65	1	C34	0	0	0		40		1	0	0	0	0	1	0	0	0	0	1	1	0	0	0	0	9400	11.4	603000	0	0	1	0	0	0	0	0	0	0	0	0	0	0	0	0	0	0	0	0
41	80454743	43	1	C34.9	1	1	0	1.58	53	#NAME?	0	0	0	1	0	1	0	0	0	0	0	1	0	0	0	0	8500	12.8	400000	0	0	0	1	0	0	0	0	0	0	0	0	0	0	0	0	0	0	0	0
42	80488799	42	1	C34.9	1	1	0	1.61	43	#NAME?	0	0	0	0	0	1	0	0	0	0	0	0	0	0	0	0	9900	11.2	91000	0	0	0	0	1	0	0	0	0	0	0	0	1	0	0	0	0	0	0	2
43	80496276	68	1	C34.9	0	0	0	1.55	40	#NAME?	0	0	0	0	0	0	0	0	0	0	0	0	0	0	0	0	16900	8.9	625000	0	0	0	0	1	0	0	0	0	0	0	0	0	0	0	0	1	0	0	1
44	80627950	57	1	C34.9	0	0	0				0	0	0	0	0	0	0	0	0	0	0	0	0	0	0	0	12300	13.7	254000	1	0	0	0	0	0	0	0	0	0	0	0	0	0	0	0	0	0	0	0
45	80638267	32	1	C40	0	1	1	1.76	75	#NAME?	0	0	0	0	0	0	0	0	0	1	0	0	0	0	0	0	5100	9.8	250000	1	0	0	0	0	0	1	0	0	0	0	0	0	0	0	0	1	0	0	2
46	80503272	45	2	C40.9	1	0	1	1.55	56	#NAME?	1	0	0	1	1	1	0	0	0	1	0	0	0	0	0	0	44300	9.5	63000	0	0	0	1	0	0	1	0	0	1	0	0	0	0	0	0	1	0	0	0
47	80645320	5	2	C40.9	1	0	1	1.13	16	#NAME?	0	0	0	0	0	0	0	0	0	1	0	0	0	0	0	1	4600	9.9	706000	0	0	0	0	0	0	0	1	0	0	0	0	0	0	0	0	0	0	0	0
48	80470290	44	1	C49	1	1	1	1.51	52	#NAME?	0	0	0	0	0	0	0	0	0	1	0	0	0	0	0	0	4800	9.4	205000	0	0	0	0	0	0	1	0	0	0	0	0	1	0	0	0	1	0	0	0
49	80493950	52	1	C49.5	1	0	0				1	0	0	0	1	0	0	0	0	1	0	0	0	0	0	0	5100	8.8	67000	0	0	0	1	0	0	1	0	0	0	0	0	0	0	0	1	0	0	0	1
50	80342823	55	2	C49.9	1	0	0	1.65	47	#NAME?	0	0	0	0	0	0	0	0	0	1	0	0	0	0	0	0	3000	5.7	65000	0	0	0	0	1	0	0	0	0	0	0	0	0	0	0	0	0	0	0	0
51	80479695	40	1	C49.9	1	0	1	1.68	75	#NAME?	0	0	0	0	0	0	0	0	0	0	0	0	0	0	0	0	300	13.6	104000	0	0	1	0	1	0	0	0	0	0	0	0	1	0	0	0	0	0	0	1
52	80463882	52	2	C50	1	0	0				0	0	0	1	0	0	0	0	0	1	0	0	0	1	0	0	5800	9.1	34000	0	0	0	0	1	0	0	0	0	1	0	0	0	0	0	0	1	0	0	1
53	80485243	44	2	C50	1	0	1	1.54	60	#NAME?	1	0	0	0	0	0	0	0	0	0	0	0	0	0	0	0	6400	9.6	336000	0	0	0	1	0	0	0	0	0	0	0	0	0	0	0	0	0	0	0	0
54	80490457	54	2	C50	1	0	0	1.53	48	#NAME?	1	0	0	0	0	0	0	0	0	1	0	0	0	0	0	0	3400	12.1	90000	0	0	0	0	1	0	0	0	0	1	0	0	0	0	0	0	1	0	0	1
55	80485243	44	2	C50	1	0	1	1.54	60	#NAME?	1	0	0	0	0	0	0	0	0	0	0	0	0	0	0	0	2900	9.4	356000	0	0	0	1	0	0	0	0	0	0	0	0	0	0	0	0	0	0	0	0
56	80297130	48	2	C50	1	0	1	1.46	38	#NAME?	1	0	0	0	0	0	0	0	0	1	0	0	0	0	0	0	1200	7.5	140000	0	0	0	0	0	0	1	0	0	0	0	0	0	0	0	0	0	0	0	0
57	80349664	60	2	C50	1	0	0	1.45	55	#NAME?	0	0	0	0	0	0	0	0	0	1	0	0	0	0	0	0	1500	7.5	150000	0	0	0	0	1	0	0	0	0	0	0	0	0	0	0	0	0	0	0	1
58	80364861	51	2	C50	1	1	0	1.48	48	#NAME?	1	0	0	0	0	0	0	0	0	1	0	0	0	0	0	0	3200	11.7	214000	0	0	0	1	0	0	0	0	0	0	0	0	0	0	0	0	0	0	0	0
59	80548367	66	2	C50	0	1	0	1.57	69	#NAME?	0	0	0	0	0	0	0	0	0	1	0	0	0	0	0	0	6800	8.5	256000	0	0	0	0	0	0	0	0	0	1	0	0	0	0	0	0	1	0	0	0
60	80150779	58	2	C50.9	1	0	0	1.6	84		0	0	0	0	0	0	0	0	0	0	0	0	0	0	0	0	6800	10.9	176000	0	0	0	0	1	0	0	0	0	0	0	0	0	0	0	0	0	0	0	0
61	80438955	74	2	C50.9	1	0	0	1.54	70	#NAME?	0	0	0	1	0	0	0	0	0	1	0	0	0	0	0	0	9900	10.7	9900	0	0	0	0	0	0	0	0	0	1	0	0	0	0	0	0	0	0	0	0
62	80407922	41	2	C78.7	1	0	0				1	0	0	1	1	0	0	1	0	0	0	0	0	0	0	0	400	12.6	27000	0	0	0	1	0	0	0	0	0	0	0	0	0	0	0	0	0	0	0	1
63	80530985	48	2	C78.7	1	1	0				1	0	0	0	0	1	0	0	0	0	0	0	0	0	0	0	19500	10.5	261000	0	0	0	0	0	0	1	0	0	0	0	0	0	0	0	1	0	0	0	0
64	80277450	79	2	C78.8	1	0	0				0	0	0	1	0	0	0	0	0	1	0	0	0	0	0	0	5600	8.5	128000	0	0	0	0	0	0	1	0	0	0	0	0	0	0	0	0	0	0	0	0
65	80536168	42	2	C53.9	1	0	0				0	0	0	0	0	0	0	0	0	0	0	0	0	0	0	0	20200	13.3	396000	0	0	0	0	0	0	0	0	0	1	0	0	1	0	0	0	0	0	0	0
66	80645977	57	2	C53.9	1	0	0	1.6	51	#NAME?	1	0	0	0	0	0	0	0	0	0	0	0	0	0	0	0	700	9.1	80000	0	0	0	1	0	0	0	0	0	0	0	0	0	0	0	0	0	0	0	0
67	80219405	63	2	C53.9	1	1	0	1.59	91	#NAME?	0	0	0	0	0	0	0	0	0	0	0	0	0	0	0	0	14300	10.6	208000	0	0	0	1	0	0	0	0	0	0	0	0	0	0	0	0	0	0	0	0
68	80233738	55	2	C56	1	0	1	1.42	58	#NAME?	0	0	0	0	0	0	0	0	0	0	0	0	0	0	0	0	15700	10.3	193000	0	0	0	1	0	0	0	0	0	1	0	0	0	0	0	0	2	0	0	0
69	80676157	36	2	C56	1	0	1	1.51	37	#NAME?	0	0	0	1	0	1	0	0	0	0	0	0	0	0	0	0	24600	9.1	116000	0	0	0	0	0	1	0	0	0	0	0	0	0	0	0	0	0	0	0	0
70	80314590	73	1	C61	0	0	1	1.51	50	#NAME?	1	0	0	0	0	0	0	0	0	0	0	0	0	0	0	0	9000	11.2	240000	0	0	0	1	0	0	0	0	0	1	0	0	0	0	0	0	2	0	0	0
71	80442473	66	1	C64	1	1	0	1.7	70	#NAME?	0	0	0	0	0	0	0	0	0	0	0	0	0	0	0	0	9900	13.2	179000	0	0	0	0	1	0	0	0	0	1	0	0	0	0	0	0	0	0	0	0
72	80453061	47	1	C64	0	1	1	1.66	54	#NAME?	1	0	0	0	0	0	0	0	0	1	0	0	0	0	0	0	4000	13.6	382000	0	0	0	0	1	0	0	0	0	0	0	0	0	0	0	0	0	0	0	0
73	80504372	7	1	C64	1	1	1	1.12	15	#NAME?	0	0	0	0	0	0	0	1	0	1	0	0	0	0	0	0	700	7.8	13000	0	0	0	1	0	0	0	0	0	0	0	0	0	0	0	0	0	0	0	1
74	80411507	64	1	C67	1	1	0				0	0	0	0	0	0	0	0	0	0	0	0	0	0	0	1	23500	12	187000	1	0	0	0	0	0	0	0	0	0	0	0	0	0	0	0	0	0	0	0
75	80416208	45	1	C67	1	1	1	1.77	60	#NAME?	0	0	0	0	0	0	0	0	0	1	0	0	0	0	0	0	10000	9.3	283000	0	0	0	1	0	0	0	0	0	1	0	0	0	0	0	0	2	0	0	0
76	80590735	76	1	C67	1	1	0	1.51	43	#NAME?	0	0	0	0	1	0	0	0	0	0	0	0	0	0	0	0	2800	9.5	219000	0	0	0	0	1	0	0	0	0	1	0	0	0	0	0	0	3	0	1	0
77	80545440	70	1	C67.9	0	1	0	1.58	35	#NAME?	0	0	0	0	0	0	0	0	0	0	0	0	0	0	0	0	5800	8.7	252000	0	0	0	0	0	0	0	0	0	1	0	0	0	0	0	0	1	3	0	1
78	80586854	54	1	C67.9	1	1	1	1.66	50	#NAME?	1	0	0	0	0	0	0	0	0	0	0	0	0	0	1	0	17800	10.8	315000	0	0	0	0	0	0	0	0	0	1	0	0	0	0	0	0	1	0	0	1
79	80400916	2	1	C71	1	0	1	0.88	12	#NAME?	0	0	0	1	0	0	0	0	0	1	0	0	0	0	0	0	300	6.5	18000	0	0	0	1	0	0	0	0	0	0	0	0	0	0	0	0	0	0	0	0
80	80498210	6	2	C71.6	1	1	1	1.06	15.7	#NAME?	0	0	0	1	0	0	0	0	0	1	0	0	0	0	0	0	700	9.3	32000	0	0	0	0	0	0	0	1	0	0	0	0	0	0	0	0	0	0	0	0
81	80469031	31	2	C71.9	1	1	1				0	0	0	1	0	1	0	0	0	1	0	0	0	0	0	0	13700	11.3	449000	0	0	0	0	1	1	1	0	0	0	0	0	1	0	0	0	0	0	0	1
82	80536242	68	1	C78.7	1	0	0	1.64	58	#NAME?	1	0	0	0	0	0	0	0	0	1	0	0	0	1	0	0	111700	7.9	874000	0	0	0	1	0	0	0	0	0	0	0	0	0	0	0	0	0	0	0	1
83	80473006	51	1	C79.8	0	0	0				1	0	0	0	0	0	0	0	0	1	0	0	0	0	0	0	17500	5.9	397000	1	0	0	0	0	0	0	0	0	0	0	0	1	0	0	0	0	0	0	0
84	80631635	45	1	C81.9	1	0	0	1.8	49	#NAME?	0	0	0	0	0	1	0	0	0	1	0	0	0	0	0	0	300	10.4	12000	0	0	0	0	0	1	0	0	0	0	0	0	0	0	0	0	1	0	0	0
85	80210045	41	1	C85.1	1	0	0	1.68	47	#NAME?	0	1	0	0	0	0	0	0	0	1	0	0	0	0	0	0	4600	6.2	30000	0	0	0	0	1	0	0	0	0	0	0	0	0	0	0	0	0	0	0	1
86	80474765	17	1	C85.1	1	0	0	1.56	43	#NAME?	1	1	0	1	0	0	0	0	0	1	0	0	0	0	0	0	800	6.7	6000	0	0	0	1	0	0	0	0	0	0	0	0	0	0	0	0	0	0	0	1
87	80480813	24	1	C85.1	1	0	0	1.71	41	#NAME?	0	0	0	0	0	0	0	0	0	1	0	0	0	0	0	0	7700	10.6	378000	0	0	0	1	0	0	0	0	0	0	0	0	0	0	0	0	0	0	0	0
88	80483638	7	1	C85.1	1	0	0	1.2	20	13.88888889	0	0	1	0	0	0	0	0	0	1	0	0	0	0	0	0	1700	6.1	17000	0	0	0	1	0	0	0	0	0	0	0	0	1	0	0	0	0	0	0	0
89	80255372	43	1	C85.9	1	1	0	1.7	50	#NAME?	0	0	0	0	0	0	0	0	0	0	0	0	0	0	0	0	6200	13.7	181000	0	0	0	0	0	0	0	0	0	1	0	0	0	0	0	0	1	0	0	0
90	80345544	69	2	C85.9	1	0	0	1.48	35	#NAME?	0	0	0	0	0	0	0	0	0	0	0	0	0	0	0	0	18300	11.2	18300	0	0	0	0	1	0	0	0	0	0	0	0	0	0	0	0	0	0	0	0
91	80480479	22	1	C85.9	1	1	0	1.8	55	#NAME?	1	0	0	0	0	0	0	0	0	1	0	0	0	0	0	0	1700	10.8	140000	0	0	0	0	0	0	1	0	0	0	0	0	0	0	0	0	1	0	0	1
92	80480544	55	2	C85.9	1	1	0	1.64	60	#NAME?	0	0	0	1	0	0	0	0	0	1	0	0	0	0	0	0	4100	10.5	20000	0	0	0	1	0	0	0	0	0	0	0	0	0	0	0	0	0	0	0	0
93	80482561	72	1	C85.9	1	0	0	1.68	49	#NAME?	0	0	0	0	0	0	0	0	0	1	0	0	0	0	0	0	19800	9.3	124000	0	0	0	1	1	0	0	0	0	0	0	0	0	0	0	0	0	0	0	1
94	80494201	51	2	C85.9	1	1	0	1.52	56	#NAME?	1	0	0	0	0	0	1	0	0	1	0	0	0	0	0	0	18300	11	323000	0	0	0	1	0	0	1	0	0	0	0	0	1	1	0	0	0	0	0	0
95	80502687	66	1	C85.9	0	0	0		55		1	0	0	0	0	1	0	0	0	1	0	0	0	0	0	0	47000	13	47000	0	0	0	1	0	0	0	0	0	0	0	0	0	0	0	0	0	0	0	0
96	80460415	68	1	C90.0	1	0	0	1.71	50	#NAME?	1	1	0	0	0	1	0	0	0	0	0	0	0	0	0	0	5400	9.6	178000	0	0	0	0	1	1	0	0	0	0	0	0	1	0	0	0	0	0	1	0
97	80463909	57	2	C90.0	1	1	0	1.45	40	#NAME?	0	0	0	0	0	0	0	0	0	1	0	0	0	0	0	0	9000	10.2	497000	0	0	0	0	1	0	0	0	0	1	0	0	0	0	0	0	0	1	0	0
98	80469056	57	1	C90.0	1	0	0	1.72	60	#NAME?	0	0	0	0	0	1	0	0	0	0	0	0	0	0	0	0	300	13.4	52000	0	0	0	1	0	0	0	0	0	0	0	0	0	0	0	0	0	0	0	0
99	80472748	72	1	C90.0	0	0	0	1.7	58	#NAME?	0	0	0	0	0	0	0	0	0	1	0	0	0	0	0	0	4700	8.2	104000	0	0	0	0	0	0	0	0	0	1	0	0	0	0	0	0	0	1	0	0
100	80598530	46	1	C90.0	0	0	0	1.5	45	#NAME?	1	0	0	0	0	0	0	0	0	0	0	0	0	0	0	0	8700	9	192000	0	0	0	0	1	0	0	0	0	0	0	0	0	0	0	0	0	0	1	0
101	80533409	62	2	C90.0	1	0	0				1	1	0	0	0	1	0	0	0	1	0	0	0	0	0	0	1200	10.6	7000	0	0	0	1	0	0	0	0	0	0	0	0	0	0	0	0	1	0	0	0
102	80502582	12	1	C91.0	1	0	0	1.32	24	#NAME?	1	1	1	0	0	0	0	0	0	1	0	0	0	0	0	0	2800	10.4	95000	0	0	0	1	0	0	0	0	0	0	0	0	0	0	0	0	0	0	0	0
103	80568683	1	1	C91.0	1	0	0		6		0	1	1	1	0	0	0	0	0	1	0	0	0	0	0	0	7600	10.9	63000	0	0	0	1	0	0	1	0	0	0	0	0	0	0	0	0	1	0	0	2
104	80574236	65	1	C91.0	1	0	0	1.75	62	#NAME?	0	0	1	0	0	0	0	0	0	1	0	0	0	0	0	0	75200	5	23000	0	0	0	1	0	0	0	1	0	0	0	0	1	0	0	0	0	0	0	0
105	80591397	4	1	C91.0	1	0	0				0	0	1	0	0	0	0	0	0	0	0	0	0	0	0	0	6400		324000	0	0	0	1	0	0	1	0	0	0	0	0	0	0	0	0	0	0	0	1
106	80597378	2	2	C91.0	1	0	0	0.78	7.7	#NAME?	0	1	1	1	0	0	0	1	0	1	0	0	0	0	0	0	900	8.6	87000	0	0	0	1	0	0	1	0	0	0	0	0	0	0	0	0	0	1	0	1
107	80426885	22	1	C91.0	1	0	0	1.73	53	#NAME?	0	0	0	0	0	0	0	0	0	1	0	0	0	0	0	0	1600	7.6	150000	0	0	0	0	0	0	1	0	0	0	0	0	0	0	0	0	0	0	0	0
108	80435191	16	1	C91.0	1	0	0	1.6	37		0	1	1	0	0	0	0	0	0	0	0	0	0	0	0	0	2000	11.5	161000	0	0	0	1	0	0	1	0	0	0	1	0	0	0	1	0	0	0	0	1
109	80452934	22	1	C91.0	1	0	0	1.71	62	#NAME?	0	0	0	1	0	0	0	0	0	1	0	0	0	0	0	0	600	7.4	34000	0	0	0	0	1	0	0	0	0	0	0	0	0	0	0	0	0	1	0	0
110	80471780	3	1	C91.0	1	0	0	0.84	13.4	#NAME?	0	0	1	0	0	0	0	0	0	0	0	0	0	0	0	0	3300	13.3	530000	0	0	0	1	0	0	1	0	1	0	0	0	0	0	2	0	0	0	0	1
111	80367052	28	1	C91.0	1	0	0	1.66	55	#NAME?	1	1	0	0	0	0	0	0	0	1	0	0	0	0	0	0	3700	13.2	97000	0	0	0	1	0	0	0	0	0	0	0	0	0	0	0	0	0	0	0	1
112	80307715	25	1	C91.0	1	1	0	1.65	50		0	0	0	0	0	1	0	0	0	0	0	0	0	0	0	0	1400	8.1	19000	0	0	0	0	1	0	0	0	0	0	0	0	0	0	0	0	0	1	0	0
113	80370890	3	2	C91.0	1	0	0	0.85	12	#NAME?	1	1	1	0	0	0	0	0	0	1	0	0	0	0	0	0	1000	9.1	410000	0	0	0	0	0	0	0	0	1	0	0	0	0	0	0	0	0	0	0	1
114	80391506	12	1	C91.0	1	0	0	1.36	26	#NAME?	0	0	1	0	0	0	0	0	0	0	0	0	0	0	0	0	1500	13.7	244000	0	0	0	1	0	0	0	0	0	0	0	0	0	0	0	0	0	0	0	0
115	80401097	5	1	C91.0	1	0	0	1.12	17	#NAME?	0	0	1	0	0	0	0	0	0	0	0	0	0	0	0	0	5500	10.6	252000	0	0	0	0	0	0	0	0	0	1	0	0	0	0	0	0	0	0	0	1
116	80436427	2	2	C91.0	1	0	0	0.87	12	#NAME?	0	0	0	1	0	0	0	0	0	1	0	0	0	0	0	0	3600	7.6	107000	0	0	0	0	0	0	1	0	0	0	0	0	0	0	0	0	0	0	0	0
117	80438028	3	1	C91.0	1	0	0	0.99	13	#NAME?	0	0	1	1	0	0	0	1	0	1	0	0	0	0	0	0	10200	10.2	418000	0	0	0	1	0	0	0	1	0	0	0	0	0	0	1	0	0	0	0	0
118	80448337	8	2	C91.0	1	0	0	1.21	22		0	0	0	0	0	0	0	0	0	0	0	0	0	0	0	0	5500	11.9	367000	0	0	0	0	1	0	0	0	0	0	0	0	0	0	0	0	0	0	1	0
119	80465028	24	1	C91.0	1	0	0	1.73	58	#NAME?	0	0	0	1	0	1	0	0	0	1	0	0	0	0	0	0	300	9.3	10000	0	0	0	1	0	0	0	0	0	0	0	0	0	0	0	0	2	0	0	0
120	80467327	12	1	C91.0	1	0	0	1.4	28	#NAME?	0	0	1	0	0	0	0	0	0	1	0	0	0	0	0	0	3100	8.1	73000	0	0	0	1	0	0	0	0	0	0	0	0	0	0	0	0	0	0	0	0
121	80468361	9	1	C91.0	1	0	0				1	1	1	1	0	1	0	1	0	1	0	0	0	0	0	0	300	9.4	5000	0	0	0	1	0	0	0	0	0	0	0	0	0	0	0	0	4	0	0	0
122	80471775	24	1	C91.0	1	0	0	1.64	53	#NAME?	0	0	0	1	0	0	0	0	0	1	0	0	0	0	0	0	800	9.9	10000	0	0	0	1	0	0	0	0	0	0	0	1	0	0	0	0	0	0	0	0
123	80474719	1	1	C91.0	1	0	0	0.85	13	#NAME?	0	0	1	0	0	0	0	0	0	0	0	0	0	0	0	0	2400	9.3	255000	0	0	0	1	0	0	0	0	0	1	0	0	0	0	0	0	1	0	0	0
124	80482920	16	1	C91.0	1	0	0	0.752	16.3	#NAME?	0	1	1	0	0	0	0	0	0	1	0	0	0	0	0	0	1900	6.7	44000	0	0	0	0	0	0	0	0	1	0	0	0	0	0	0	0	0	0	0	0
125	80488725	6	1	C91.0	1	0	0	1.21	26	#NAME?	0	0	1	0	0	0	0	1	0	1	0	0	0	0	0	0	300	7.3	30000	0	0	0	1	0	0	1	0	0	0	0	0	0	0	0	0	0	0	0	4
126	80553740	55	1	C91.1	1	0	0	1.73	64	#NAME?	1	1	0	0	0	0	0	0	0	1	0	0	0	0	0	0	5100	11.1	11000	0	0	0	0	1	0	0	0	0	0	0	0	2	0	0	0	0	0	0	0
127	80262162	63	1	C92.0	1	0	0	1.64	66	#NAME?	0	0	0	0	0	0	0	0	0	1	0	0	0	0	0	0	600	8.3	10000	0	0	0	0	0	0	0	0	0	1	0	0	0	0	0	0	0	1	0	0
128	80438425	50	2	C92.0	1	0	0	1.75	55	#NAME?	0	0	0	0	0	0	0	0	0	1	0	0	0	0	0	0	3700	8.9	81000	0	0	0	1	0	0	0	0	0	0	0	0	0	0	0	0	0	1	0	0
129	80455422	7	2	C92.0	1	0	0	1.18	20.73	#NAME?	1	1	0	1	0	0	0	0	0	1	0	0	0	0	0	0	300	11.1	16000	0	0	0	1	0	0	0	0	0	0	0	0	0	0	0	0	0	0	0	1
130	80478925	61	2	C92.0	0	0	0	1.47	27	#NAME?	1	1	0	0	0	0	0	0	0	1	0	0	0	0	0	0	1100	3.8	20000	0	0	0	1	0	0	0	0	0	0	0	0	0	0	0	0	0	0	0	1
131	80482643	35	2	C92.0	1	0	0	1.57	37	#NAME?	0	0	0	0	0	0	0	1	0	1	0	0	0	0	0	0	3900	6.6	246000	0	0	0	0	1	0	0	0	1	0	0	0	0	0	0	0	0	0	0	0
132	80494596	56	1	C92.0	1	0	0	1.51	40	#NAME?	0	0	0	0	0	0	0	0	0	1	0	0	0	0	0	0	1000	6.9	14000	0	0	0	1	0	0	1	0	0	0	0	0	0	0	0	0	0	0	0	2
133	80500364	35	2	C92.0	1	0	0	1.45	40	#NAME?	1	1	0	0	0	0	0	0	0	1	0	0	0	0	0	0	6000	7.7	26000	0	0	0	1	1	0	0	0	0	0	0	0	0	0	0	0	0	1	0	1
134	80532624	15	2	C92.0	1	0	0	1.57	37	#NAME?	0	1	0	1	0	0	0	0	0	1	0	0	0	0	0	0	400	8.8	7000	0	0	0	1	0	0	1	0	0	0	0	0	0	0	0	0	1	0	0	0
135	80645360	11	1	C92.0	1	0	0	1.51	44	#NAME?	1	1	0	1	0	0	0	0	0	1	0	0	0	0	0	0	200	7.7	6000	0	0	0	1	0	0	0	0	0	0	0	0	0	0	0	0	0	0	0	0
136	80696641	30	1	C92.0	1	0	0	1.69	46	#NAME?	0	0	0	1	0	1	0	0	0	1	0	0	0	0	0	0	100	8.1	2000	0	0	0	1	0	0	1	0	0	0	0	0	0	0	0	0	0	0	0	1
137	80389374	60	2	C92.1	1	0	0	1.52	55	#NAME?	0	1	0	0	0	0	0	0	0	1	0	0	0	0	0	0	600	7.8	46000	0	0	0	0	0	0	1	0	0	0	0	0	0	0	0	0	0	0	0	0
138	80486802	65	2	C92.1	0	0	0	1.556	45	#NAME?	0	0	0	0	0	0	0	0	0	1	0	0	0	0	0	0	2900	8.3	45000	0	0	0	1	0	0	0	0	0	0	0	0	0	0	0	0	1	0	0	0
139	80498223	56	1	C92.1	1	0	0	1.59	49	#NAME?	0	1	0	0	0	0	0	0	0	0	0	0	0	0	0	0	11400	10.1	2025000	0	0	0	0	1	0	0	0	0	0	0	0	0	0	0	0	0	0	0	0
140	80611976	55	2	C92.1	1	0	0	1.6	45	#NAME?	0	0	0	0	0	0	0	0	0	1	0	0	0	0	0	0	6300	8.7	160000	0	0	0	0	0	0	0	0	0	0	1	0	0	0	0	0	0	0	0	0
[truncated: 12 more columns]
